# Supplementary material for: HPV16 early gene E5 specifically reduces miRNA-196a in cervical cancer cells
Source: PubMed Central journal article supplement — Sci Rep. 2015 Jan 7;5:7653. doi: 10.1038/srep07653 (PMC4288222; doi:10.1038/srep07653), 2015-01-07
Supplement: srep07653-s1.pdf [file srep07653-s1.pdf]

**Supplementary Data for manuscript 'HPV16 early gene E5 specifically reduces miRNA-196a in cervical cancer cells'**

Chanzhen Liu<sup>1, 2</sup>; Jianfei Lin<sup>1,3</sup>; Lianqin Li<sup>4</sup>; Yonggang Zhang<sup>1</sup>; Weiling Chen<sup>1</sup>; Zeyi Cao<sup>4</sup>; Huancong Zuo<sup>1, 4</sup>, \*Chunling Chen<sup>1,5</sup>; \*Kehkooi Kee<sup>1</sup>

A.

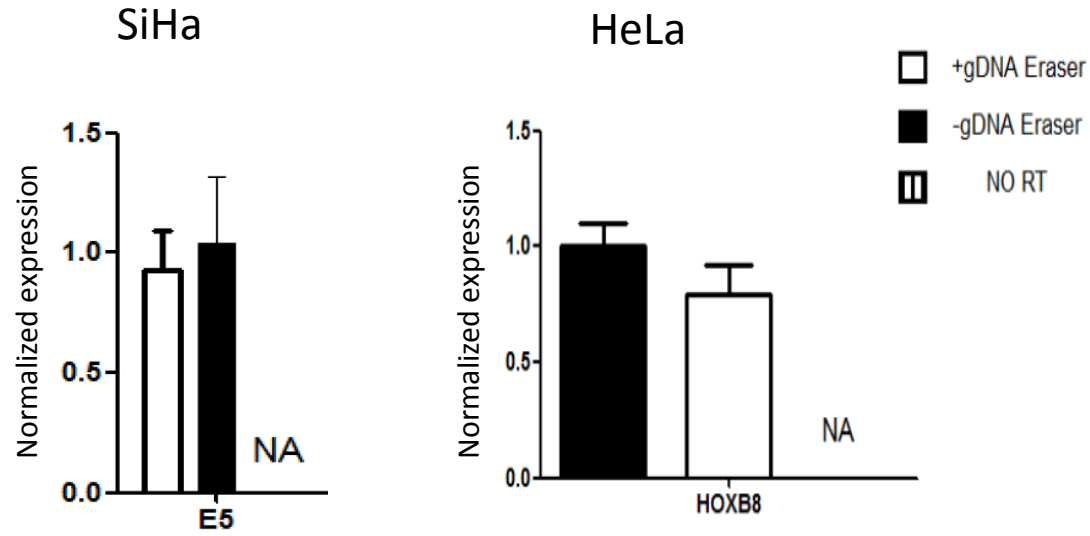

B. HPV16-E2 expression

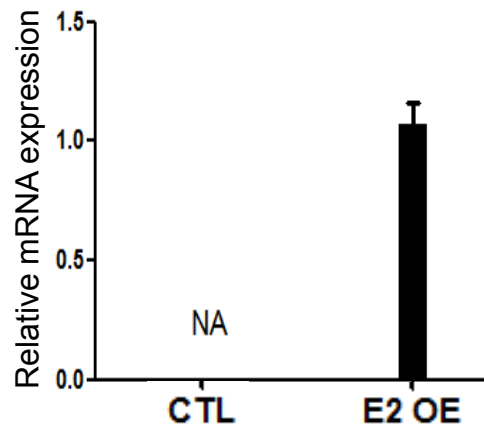

C. miR196a expression

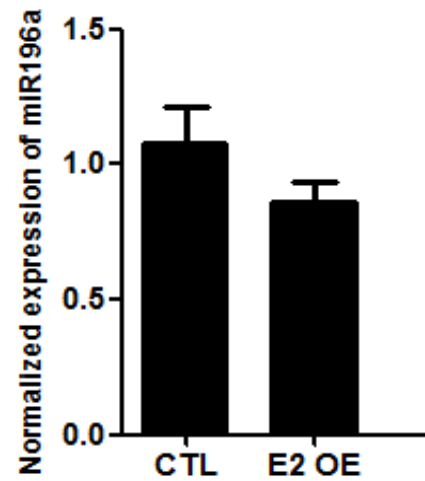

D. HOXB8 expression

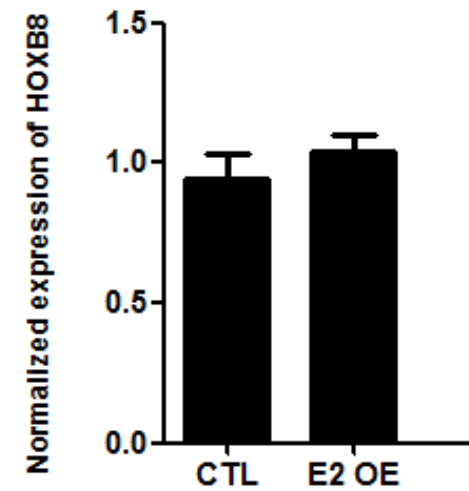

Supplementary Figure 1.

A.

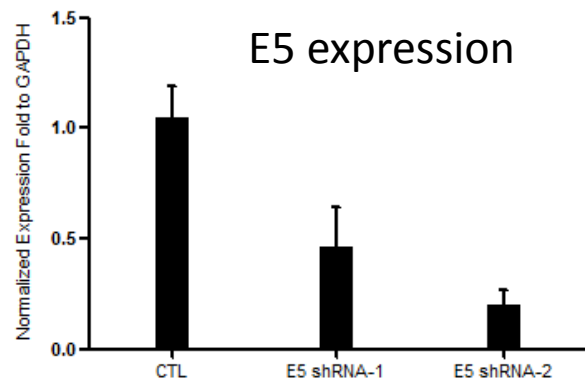

B.

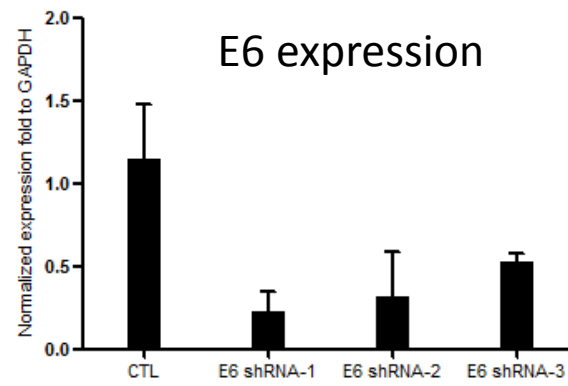

C.

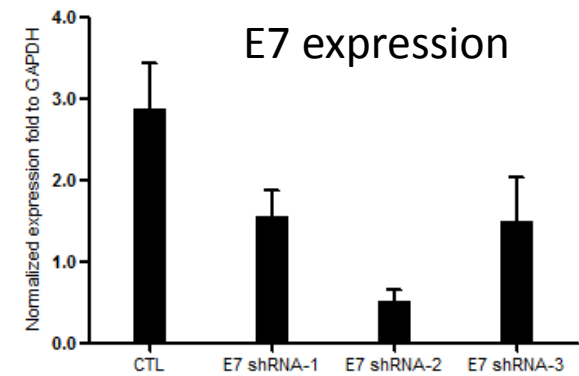

Supplementary Figure 2.

A. E5 shRNA

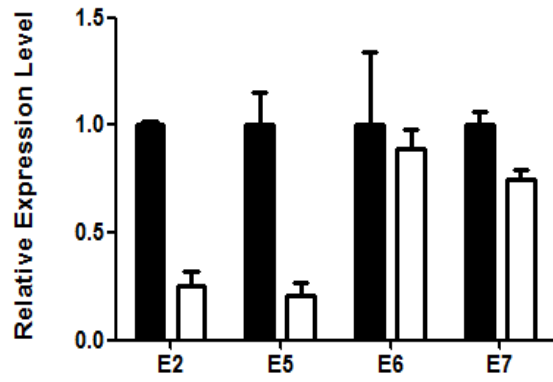

B. E5 shRNA

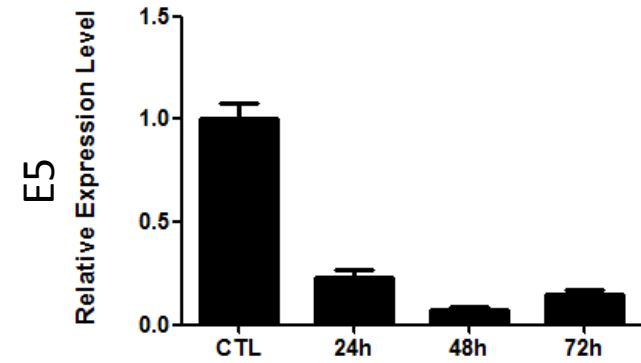

C. E6 shRNA

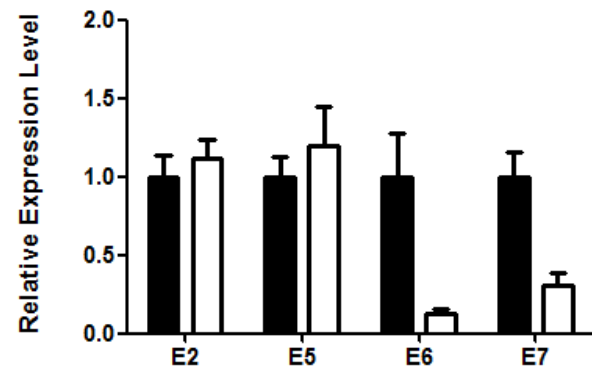

D. E6 shRNA

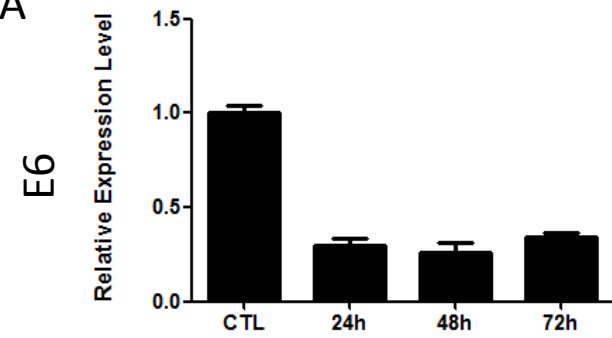

E. E7 shRNA

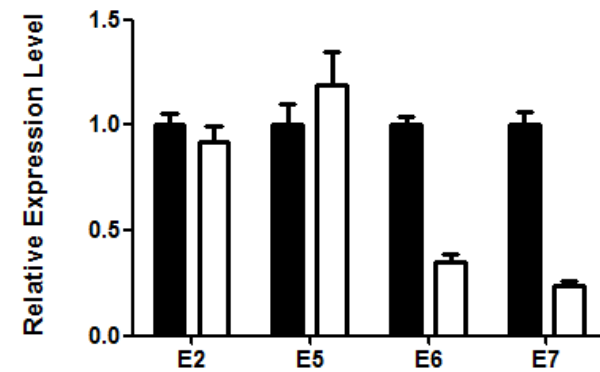

F. E7 shRNA

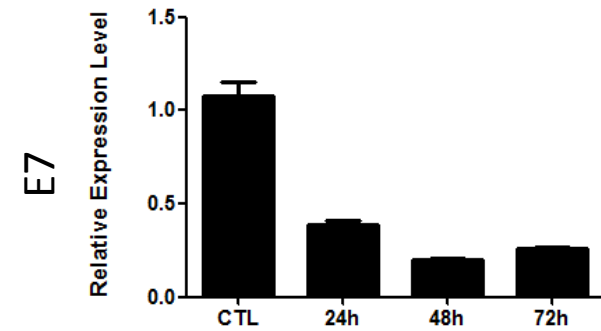

Supplementary Figure 3.

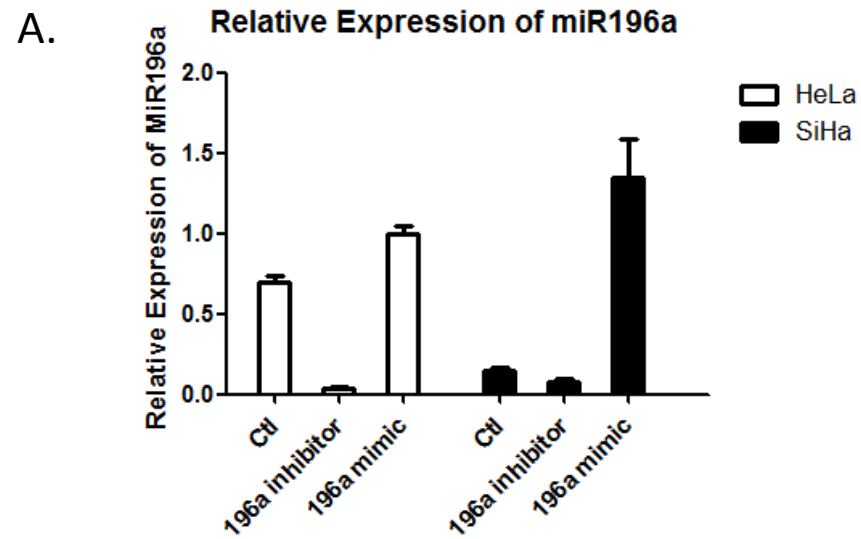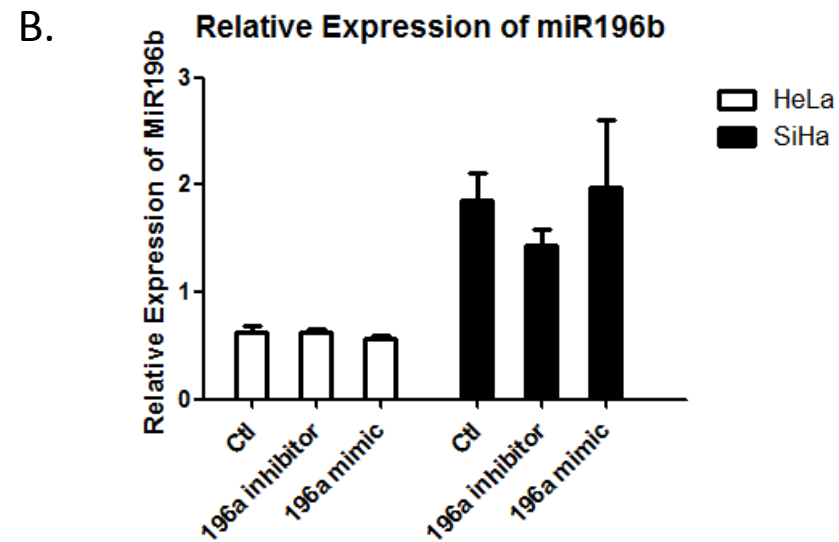

Supplementary Figure 4.

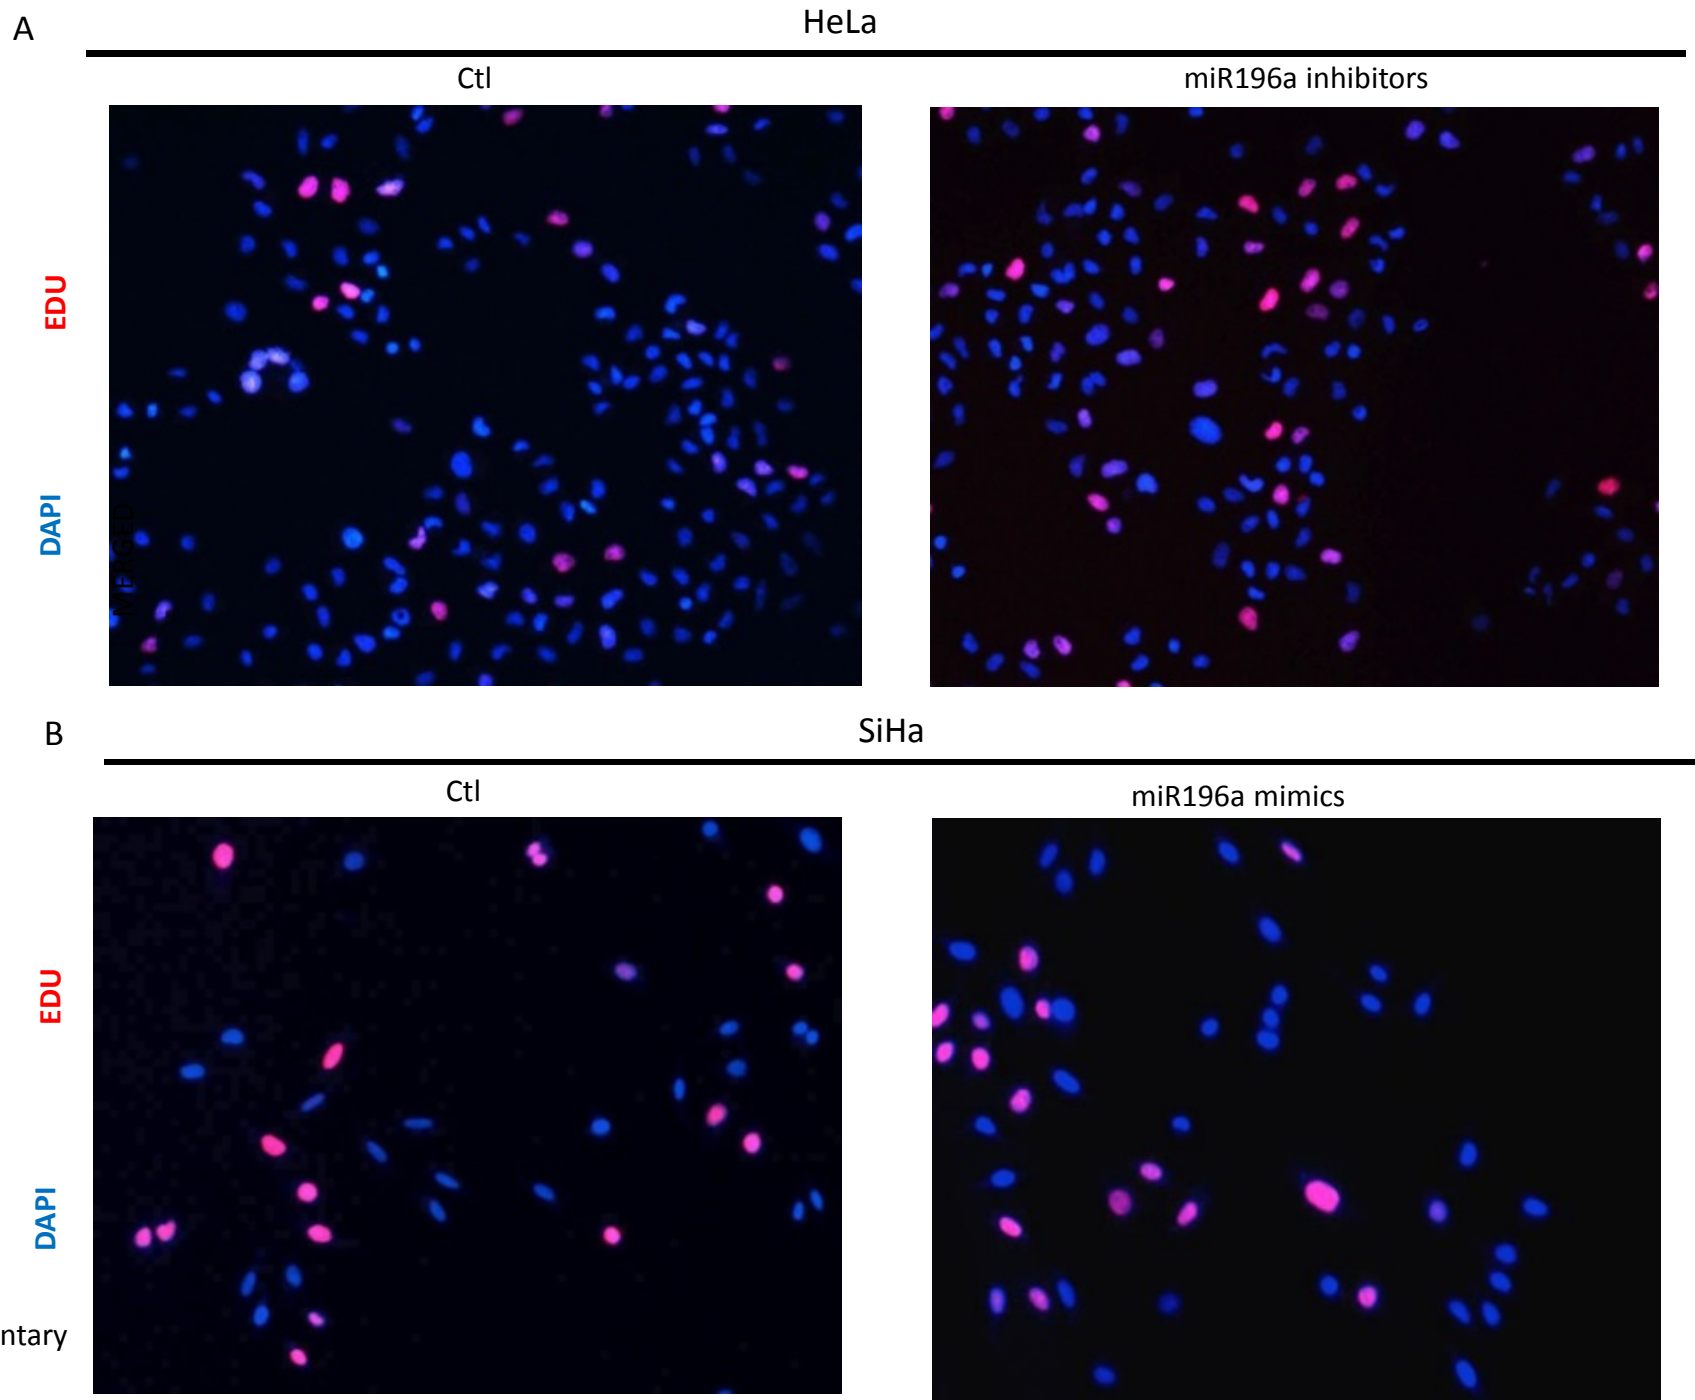

Supplementary  
Figure 5.

Supplementary Table 1. Primer sequences of the genes used in this study

| Gene              |         | Sequence                           |
|-------------------|---------|------------------------------------|
| HPV16 E2 -qPCR    | Forward | GGCCAGAGAAATGGGATTTA               |
|                   | Reverse | TTAGTTGCAGTTCAATTGCTTG             |
| HPV16 E5 -qPCR    | Forward | CTTGATACTGCATCCACAACA              |
|                   | Reverse | AAAAGCGTGCATGTGTATGT               |
| HPV16 E6 -qPCR    | Forward | ACTTTGCTTTTCGGGATTTATGC            |
|                   | Reverse | AGGACACAGTGGCTTTTGACAGTT           |
| HPV16 E7-qPCR     | Forward | ATGCATGGAGATACACCTACATTGC          |
|                   | Reverse | TTATGGTTTCTGAGAACAGATGGGG          |
| HOXB8-qPCR        | Forward | GTCCCTGCGCCCAATTATTA               |
|                   | Reverse | GCCCGTGGTAGAACTCCTG                |
| GAPDH-qPCR        | Forward | CTGTCGTGTGACCACACTGGTGCC           |
|                   | Reverse | ATGCTTGTCATTTTTTCATTACT            |
| HPV16 E2-cloning  | Forward | GGTACCCACCATGGAGACTCTTTGCCAACGTT   |
|                   | Reverse | TCTAGATCATATAGACATAAATCCAGTA       |
| HPV16 E5-cloning  | Forward | GGTACCCACCATGACAAATCTTGATACTGCATCC |
|                   | Reverse | TCTAGATTATGTAATTA AAAAGCGTGCAT     |
| HPV16 E6 -cloning | Forward | GGTACCCACCATGCACCAAAGAGAACTGCAATG  |
|                   | Reverse | TCTAGATTACAGCTGGGTTTCTCTCGTG       |
| HPV16 E7-cloning  | Forward | GGTACCCACCATGCATGGAGATACACCTACATT  |
|                   | Reverse | TCTAGATTATGGTTTCTGAGAACAGATGGG     |

## Supplementary Table 2. Sequences of shRNAs used in this study

| Gene     |         | Sequence                                           |
|----------|---------|----------------------------------------------------|
| HPV16 E5 | shRNA-1 | CACCGATACTGCATCCACAACATTACGAATAATGTTGTGGATGCAGTATC |
|          | shRNA-2 | CACCGCCTATTAATACGTCCGCTGCCGAAGCAGCGGACGTATTAATAGGC |
| HPV16 E6 | shRNA-1 | CACCGGAGCGACCCAGAAAGTTACCCGAAGGTAACCTTCTGGGTCGCTCC |
|          | shRNA-2 | CACCGGGAATCCATATGCTGTATGTCGAAACATACAGCATATGGATTCCC |
|          | shRNA-3 | CACCGGTCGATGTATGTCTTGTTCGCCAAGCAACAAGACATACATCGACC |
| HPV16 E7 | shRNA-1 | CACCGCATGGAGATACACCTACATTCGAAAATGTAGGTGTATCTCCATGC |
|          | shRNA-2 | CACCGGACAGAGCCCATTACAATATCGAAATATTGTAATGGGCTCTGTCC |
|          | shRNA-3 | CACCGCAAGTGTGACTCTACGCTTCCGAAGAAGCGTAGAGTCACACTTGC |

## Supplementary Table 3. Sequence of miR196a and miR196b

| Name            | Accession                    | sequence                |
|-----------------|------------------------------|-------------------------|
| hsa-miR-196a-5p | <a href="#">MIMAT0000226</a> | uagguaguuucauguuguuggg  |
| hsa-miR-196b-5p | <a href="#">MIMAT0001080</a> | uagguaguuuuccuguuguuggg |
